# Supplementary material
Source: MDPI journal article supplement (https://www.mdpi.com/2220-9964/9/5/329)
Supplement: s1 [file s1]

## Supplementary Material

Table 1: Examples of Primary and Secondary Forest.

| No. | Land cover class  | Description                                                                        |
|-----|-------------------|------------------------------------------------------------------------------------|
| 1   | Primary Forests   |  |
| 2   | Secondary Forests |  |

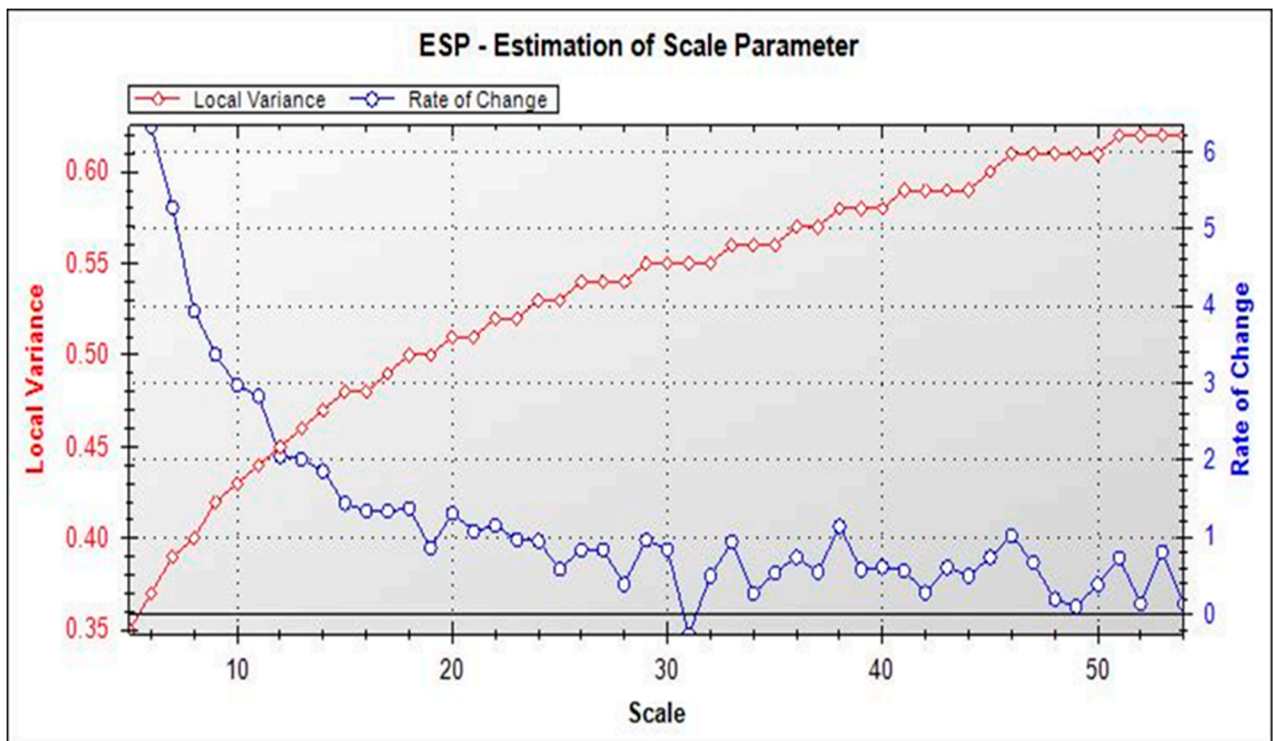

Figure 1: An out from the ESP Tool for determining the segmentation parameter - scale.

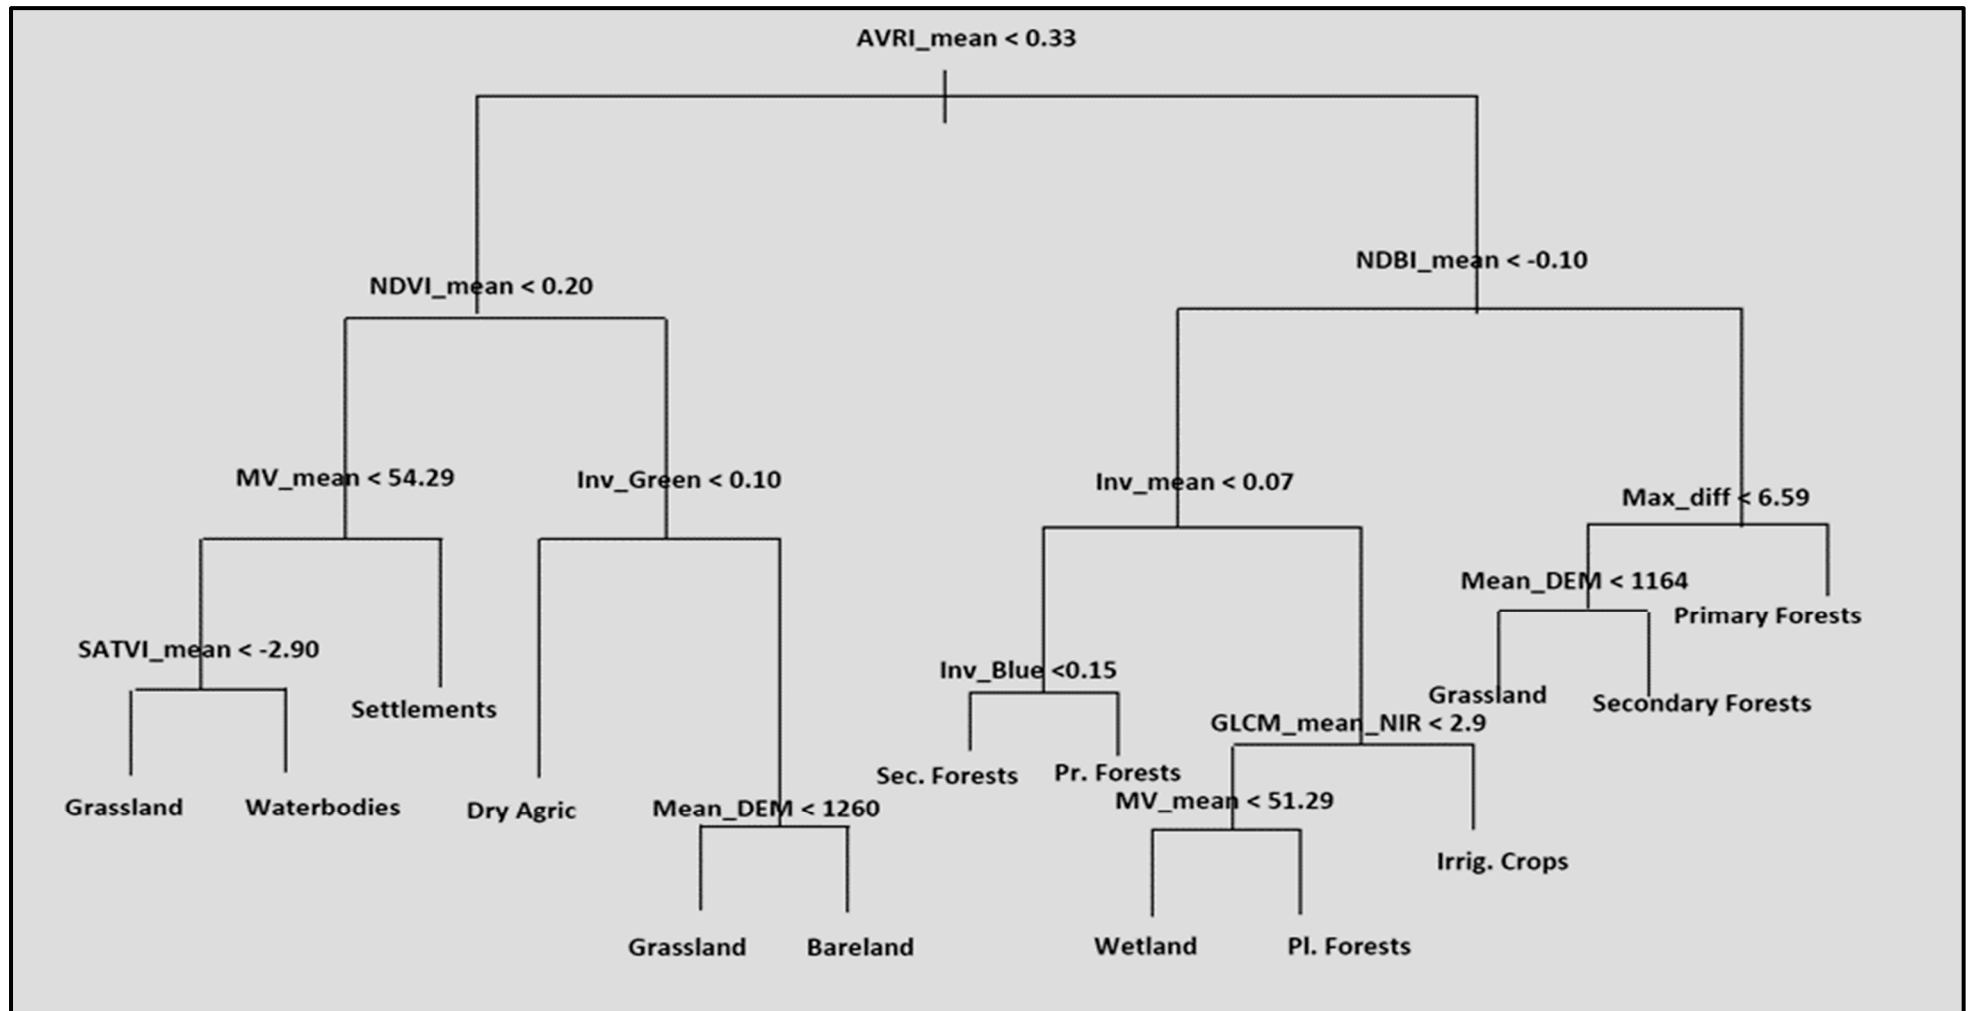

Figure 2: Examples of simple DT diagram produced for Tree algorithms.

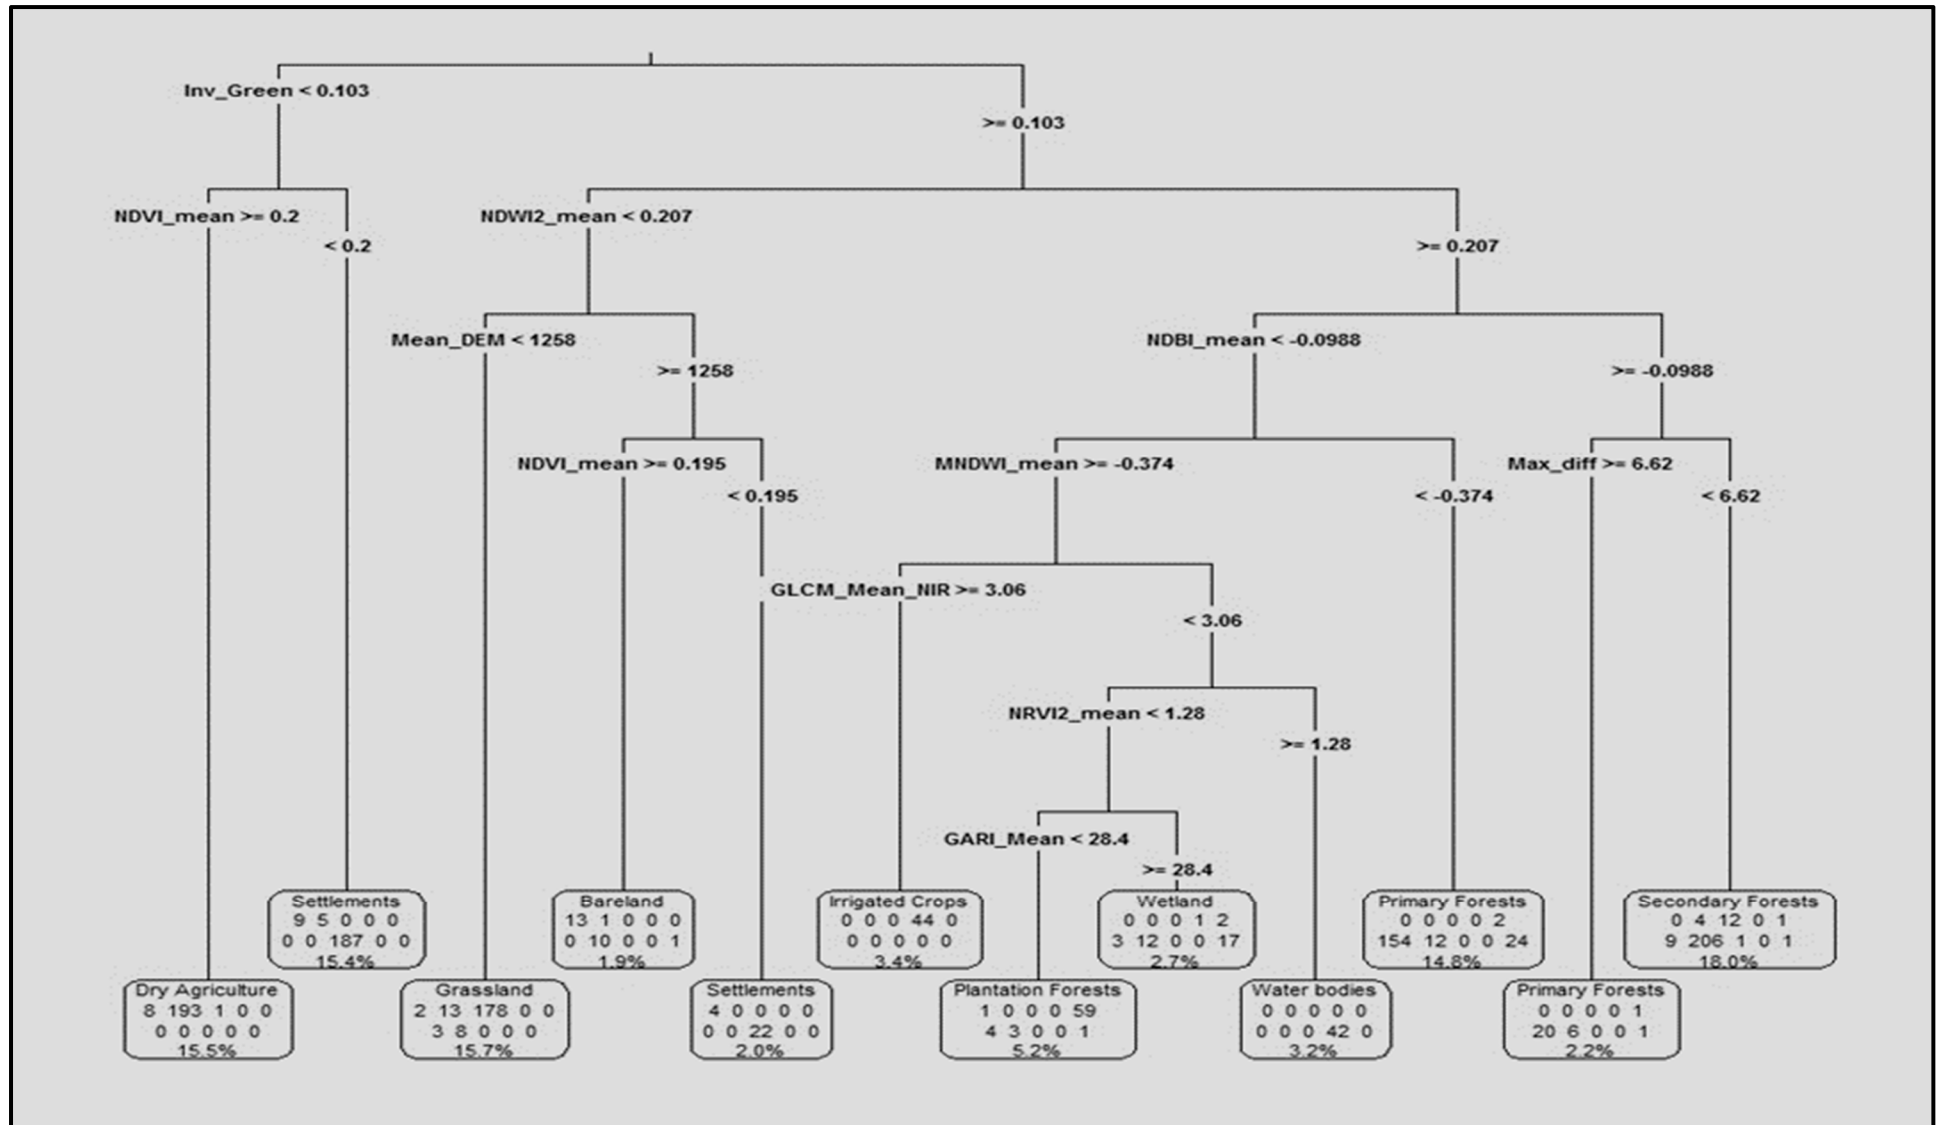

Figure 3: Examples of simple DT diagram produced using Rpart algorithms.
